# Supplementary material for: Time-critical conditions: assessment of burden and access to care using verbal autopsy in Agincourt, South Africa
Source: PubMed Central journal article supplement — BMJ Glob Health. 2020 Apr 16;5(4):e002289. doi: 10.1136/bmjgh-2020-002289 (PMC7199706; doi:10.1136/bmjgh-2020-002289), 2020-04-16
Supplement: bmjgh-2020-002289supp001.pdf [file bmjgh-2020-002289supp001.pdf]

**APPENDIX****Table A1: Classification of time-critical conditions**

| Condition type      | Inclusion criteria          | ICD-10 code | ICD-10 descriptor                                                     | Verbal autopsy code and descriptor                            |
|---------------------|-----------------------------|-------------|-----------------------------------------------------------------------|---------------------------------------------------------------|
| <b>Communicable</b> | Age:<br>Non-neonatal deaths | A40         | Streptococcal sepsis                                                  | 01.01 Sepsis                                                  |
|                     |                             | A41         | Other sepsis                                                          | <b>01.02 Acute respiratory infection, including pneumonia</b> |
|                     |                             | G00         | Bacterial meningitis, not elsewhere classified                        |                                                               |
|                     |                             | G03         | Meningitis due to other and unspecified causes                        | <b>01.05 Malaria</b>                                          |
|                     |                             | <b>J05</b>  | <b>Acute obstructive laryngitis [croup] and epiglottitis</b>          | 01.07 Meningitis and encephalitis                             |
|                     |                             | <b>B50</b>  | <b>Plasmodium falciparum malaria</b>                                  |                                                               |
| <b>Neonatal</b>     | Age:<br>Neonatal only       | A40         | Streptococcal sepsis                                                  | 01.01 Sepsis                                                  |
|                     |                             | A41         | Other sepsis                                                          | 01.02 Acute respiratory infection, including pneumonia        |
|                     |                             | <b>A49</b>  | <b>Bacterial infection of unspecified site</b>                        | 01.07 Meningitis and encephalitis                             |
|                     |                             | G00         | Bacterial meningitis, not elsewhere classified                        | <b>01.99 Unspecified infectious disease</b>                   |
|                     |                             | G03         | Meningitis due to other and unspecified causes                        | 10.02 Birth asphyxia                                          |
|                     |                             | J15         | Bacterial pneumonia, not elsewhere classified                         | 10.03 Neonatal pneumonia                                      |
|                     |                             | J16         | Pneumonia due to other infectious organisms, not elsewhere classified | 10.04 Neonatal sepsis                                         |
|                     |                             | J18         | Pneumonia, organism unspecified                                       | <b>10.06 Congenital malformation</b>                          |
|                     |                             | J22         | Unspecified acute lower respiratory infection                         | 10.99 Other and unspecified perinatal cause of death          |

|                 |     |            |                                                                                |                                             |
|-----------------|-----|------------|--------------------------------------------------------------------------------|---------------------------------------------|
|                 |     | <b>P08</b> | <b><i>Disorders related to long gestation and high birth weight</i></b>        |                                             |
|                 |     | <b>P20</b> | <b><i>Intrauterine hypoxia</i></b>                                             |                                             |
|                 |     | P21        | Birth asphyxia                                                                 |                                             |
|                 |     | P22        | Respiratory distress of newborn                                                |                                             |
|                 |     | P23        | Congenital pneumonia                                                           |                                             |
|                 |     | P36        | Bacterial sepsis of newborn                                                    |                                             |
|                 |     | <b>P50</b> | <b><i>Fetal blood loss</i></b>                                                 |                                             |
|                 |     | <b>P55</b> | <b><i>Haemolytic disease of fetus and newborn</i></b>                          |                                             |
|                 |     | <b>P58</b> | <b><i>Neonatal jaundice due to other excessive haemolysis</i></b>              |                                             |
|                 |     | <b>P76</b> | <b><i>Other intestinal obstruction of newborn</i></b>                          |                                             |
|                 |     | P90        | Convulsions of newborn                                                         |                                             |
|                 |     | <b>Q41</b> | <b><i>Congenital absence, atresia and stenosis of small intestine</i></b>      |                                             |
|                 |     | <b>Q43</b> | <b><i>Other congenital malformations of intestine</i></b>                      |                                             |
|                 |     | <b>Q45</b> | <b><i>Other congenital malformations of digestive system</i></b>               |                                             |
| <b>Maternal</b> | Nil | <b>O00</b> | <b><i>Ectopic pregnancy</i></b>                                                | <b>09.01 Ectopic pregnancy</b>              |
|                 |     | <b>O06</b> | <b><i>Unspecified abortion</i></b>                                             | <b>09.02 Abortion-related death</b>         |
|                 |     | <b>O08</b> | <b><i>Complications following abortion and ectopic and molar pregnancy</i></b> | <b>09.03 Pregnancy-induced hypertension</b> |
|                 |     | <b>O15</b> | <b><i>Eclampsia</i></b>                                                        | 09.04 Obstetric haemorrhage                 |
|                 |     | <b>O20</b> | <b><i>Haemorrhage in early pregnancy</i></b>                                   |                                             |

|                         |     |            |                                                                                                                 |                                                                                            |
|-------------------------|-----|------------|-----------------------------------------------------------------------------------------------------------------|--------------------------------------------------------------------------------------------|
|                         |     | <b>O60</b> | <b>Haemorrhage in early pregnancy</b>                                                                           | 09.06 Pregnancy-related sepsis                                                             |
|                         |     | O72        | Postpartum haemorrhage                                                                                          | <b>09.99 Other and unspecified maternal cause</b>                                          |
|                         |     | O85        | Puerperal sepsis                                                                                                |                                                                                            |
|                         |     | <b>O95</b> | <b>Obstetric death of unspecified cause</b>                                                                     |                                                                                            |
|                         |     | <b>O99</b> | <b>Other maternal diseases classifiable elsewhere but complicating pregnancy, childbirth and the puerperium</b> |                                                                                            |
|                         |     |            |                                                                                                                 |                                                                                            |
| <b>Non-communicable</b> | Nil | <b>D65</b> | <b>Disseminated intravascular coagulation [defibrination syndrome]</b>                                          | 04.01 Acute cardiac disease<br>04.02 Stroke<br>04.99 Other and unspecified cardiac disease |
|                         |     | <b>E15</b> | <b>Nondiabetic hypoglycaemic coma</b>                                                                           | 05.01 Chronic obstructive pulmonary disease (COPD)                                         |
|                         |     | <b>G36</b> | <b>Other acute disseminated demyelination</b>                                                                   | 05.02 Asthma                                                                               |
|                         |     | G40        | Epilepsy                                                                                                        | 06.01 Acute abdomen                                                                        |
|                         |     | G41        | Status epilepticus                                                                                              | 08.01 Liver cirrhosis                                                                      |
|                         |     | G81        | Hemiplegia                                                                                                      | 98 Other and unspecified noncommunicable disease**                                         |
|                         |     | I21        | Acute myocardial infarction                                                                                     | 99 Cause of death unknown                                                                  |
|                         |     | I22        | Subsequent myocardial infarction                                                                                |                                                                                            |
|                         |     | <b>I26</b> | <b>Pulmonary embolism</b>                                                                                       |                                                                                            |
|                         |     | <b>I30</b> | <b>Acute pericarditis</b>                                                                                       |                                                                                            |
|                         |     | I46        | Cardiac arrest                                                                                                  |                                                                                            |
|                         |     | <b>I60</b> | <b>Subarachnoid haemorrhage</b>                                                                                 |                                                                                            |
|                         |     | I61        | Intracerebral haemorrhage                                                                                       |                                                                                            |

|               |               |            |                                                           |                                |
|---------------|---------------|------------|-----------------------------------------------------------|--------------------------------|
|               |               | I62        | Other nontraumatic intracranial haemorrhage               |                                |
|               |               | <b>I63</b> | <b>Cerebral infarction</b>                                |                                |
|               |               | I64        | Stroke, not specified as haemorrhage or infarction        |                                |
|               |               | J44        | Other chronic obstructive pulmonary disease               |                                |
|               |               | J45        | Asthma                                                    |                                |
|               |               | J46        | Status asthmaticus                                        |                                |
|               |               | <b>J36</b> | <b>Peritonsillar abscess</b>                              |                                |
|               |               | <b>J96</b> | <b>Respiratory failure, not elsewhere classified</b>      |                                |
|               |               | K25        | Gastric ulcer                                             |                                |
|               |               | K26        | Duodenal ulcer                                            |                                |
|               |               | K27        | Peptic ulcer, site unspecified                            |                                |
|               |               | K35        | Acute appendicitis                                        |                                |
|               |               | K56        | Paralytic ileus and intestinal obstruction without hernia |                                |
|               |               | <b>L00</b> | <b>Staphylococcal scalded skin syndrome</b>               |                                |
|               |               | <b>R04</b> | <b>Haemorrhage from respiratory passages</b>              |                                |
|               |               | R10        | Abdominal and pelvic pain                                 |                                |
|               |               | R56        | Convulsions, not elsewhere classified                     |                                |
|               | If > 30 years | R96        | Other sudden death, cause unknown                         |                                |
| <b>Injury</b> | Nil           | <b>S09</b> | <b>Other and unspecified injuries of head</b>             | 12.01 Road traffic accident    |
|               |               | <b>S29</b> | <b>Other and unspecified injuries of thorax</b>           | 12.02 Other transport accident |

|  |  |            |                                                                                 |                                                              |
|--|--|------------|---------------------------------------------------------------------------------|--------------------------------------------------------------|
|  |  | <b>S36</b> | <b><i>Injury of intra-abdominal organs</i></b>                                  | 12.03 Accidental fall                                        |
|  |  | <b>T65</b> | <b><i>Toxic effect of other and unspecified substances</i></b>                  | <b>12.04 Accidental drowning and submersion</b>              |
|  |  | <b>T29</b> | <b><i>Burns and corrosions of multiple body regions</i></b>                     | 12.05 Accidental exposure to smoke, fire and flames          |
|  |  | <b>T51</b> | <b><i>Toxic effect of alcohol</i></b>                                           | 12.06 Contact with venomous animals and plants               |
|  |  | <b>T98</b> | <b><i>Sequelae of other and unspecified effects of external causes</i></b>      | 12.07 Accidental poisoning and exposure to noxious substance |
|  |  | V02        | Pedestrian injured in collision with two- or three-wheeled motor vehicle        | <b>12.08 Intentional self-harm</b>                           |
|  |  | V03        | Pedestrian injured in collision with car, pick-up truck or van                  | 12.09 Assault                                                |
|  |  | V04        | Pedestrian injured in collision with heavy transport vehicle or bus             | 12.10 Exposure to force of nature                            |
|  |  | V05        | Pedestrian injured in collision with railway train or railway vehicle           | 12.99 Other and unspecified external cause of death          |
|  |  | V09        | Pedestrian injured in other and unspecified transport accidents                 | (98 Other and unspecified noncommunicable disease**)         |
|  |  | <b>V13</b> | <b><i>Pedal cyclist injured in collision with car, pick-up truck or van</i></b> |                                                              |
|  |  | V14        | Pedal cyclist injured in collision with heavy transport vehicle or bus          |                                                              |
|  |  | V23        | Motorcycle rider injured in collision with car, pick-up truck or van            |                                                              |
|  |  | V24        | Motorcycle rider injured in collision with heavy transport vehicle or bus       |                                                              |

|  |            |                                                                                                     |
|--|------------|-----------------------------------------------------------------------------------------------------|
|  | V27        | Motorcycle rider injured in collision with other nonmotor vehicle                                   |
|  | V29        | Motorcycle rider injured in other and unspecified                                                   |
|  | <b>V43</b> | <b><i>Car occupant injured in collision with car, pick-up truck or van</i></b>                      |
|  | V44        | Car occupant injured in collision with heavy transport vehicle or bus                               |
|  | <b>V47</b> | <b><i>Car occupant injured in collision with fixed or stationary object</i></b>                     |
|  | <b>V48</b> | <b><i>Car occupant injured in noncollision transport accident</i></b>                               |
|  | <b>V49</b> | <b><i>Car occupant injured in other and unspecified transport accidents</i></b>                     |
|  | <b>V53</b> | <b><i>Occupant of pick-up truck or van injured in collision with car, pick-up truck or van</i></b>  |
|  | V54        | Occupant of pick-up truck or van injured in collision with heavy transport vehicle or bus           |
|  | <b>V58</b> | <b><i>Occupant of pick-up truck or van injured in noncollision transport accident</i></b>           |
|  | <b>V59</b> | <b><i>Occupant of pick-up truck or van injured in other and unspecified transport accidents</i></b> |
|  | V64        | Occupant of heavy transport vehicle injured in collision with heavy transport vehicle or bus        |
|  | V68        | Occupant of heavy transport vehicle injured in                                                      |

|  |  |            |                                                                                              |
|--|--|------------|----------------------------------------------------------------------------------------------|
|  |  |            | noncollision transport accident                                                              |
|  |  | <b>V74</b> | Bus occupant injured in collision with heavy transport vehicle or bus                        |
|  |  | V78        | Bus occupant injured in noncollision transport accident                                      |
|  |  | V81        | Occupant of railway train or railway vehicle injured in transport accident                   |
|  |  | <b>V83</b> | Occupant of special vehicle mainly used on industrial premises injured in transport accident |
|  |  | <b>V85</b> | Occupant of special construction vehicle injured in transport accident                       |
|  |  | V87        | Traffic accident of specified type but victim's mode of transport unknown                    |
|  |  | V89        | Motor- or nonmotor-vehicle accident, type of vehicle unspecified                             |
|  |  | <b>V90</b> | <b>Accident to watercraft causing drowning and submersion</b>                                |
|  |  | V99        | Unspecified transport accident                                                               |
|  |  | W01        | Fall on same level from slipping, tripping and stumbling                                     |
|  |  | W06        | Fall involving bed                                                                           |
|  |  | W10        | Fall on and from stairs and steps                                                            |
|  |  | <b>W11</b> | <b>Fall on and from ladder</b>                                                               |

|  |  |            |                                                                      |  |
|--|--|------------|----------------------------------------------------------------------|--|
|  |  | W13        | Fall from, out of or through building or structure                   |  |
|  |  | W14        | Fall from tree                                                       |  |
|  |  | W17        | Other fall from one level to another                                 |  |
|  |  | W18        | Other fall on same level                                             |  |
|  |  | W19        | Unspecified fall                                                     |  |
|  |  | W20        | Struck by thrown, projected or falling object                        |  |
|  |  | W23        | Caught, crushed, jammed or pinched in or between objects             |  |
|  |  | <b>W29</b> | <b>Contact with other powered hand tools and household machinery</b> |  |
|  |  | <b>W31</b> | <b>Contact with other and unspecified machinery</b>                  |  |
|  |  | <b>W34</b> | <b>Discharge from other and unspecified firearms</b>                 |  |
|  |  | <b>W49</b> | <b>Exposure to other and unspecified inanimate mechanical forces</b> |  |
|  |  | W54        | Bitten or struck by dog                                              |  |
|  |  | W55        | Bitten or struck by other mammals                                    |  |
|  |  | <b>W66</b> | <b>Drowning and submersion following fall into bath-tub</b>          |  |
|  |  | <b>W67</b> | <b>Drowning and submersion while in swimming-pool</b>                |  |
|  |  | <b>W69</b> | <b>Drowning and submersion while in natural water</b>                |  |



|  |  |            |                                                                                                  |  |
|--|--|------------|--------------------------------------------------------------------------------------------------|--|
|  |  | <b>W70</b> | <b><i>Drowning and submersion following fall into natural water</i></b>                          |  |
|  |  | <b>W73</b> | <b><i>Other specified drowning and submersion</i></b>                                            |  |
|  |  | <b>W74</b> | <b><i>Unspecified drowning and submersion</i></b>                                                |  |
|  |  | <b>W75</b> | <b><i>Accidental suffocation and strangulation in bed</i></b>                                    |  |
|  |  | <b>W77</b> | <b><i>Threat to breathing due to cave-in, falling earth and other substances</i></b>             |  |
|  |  | <b>W79</b> | <b><i>Inhalation and ingestion of food causing obstruction of respiratory tract</i></b>          |  |
|  |  | <b>W80</b> | <b><i>Inhalation and ingestion of other objects causing obstruction of respiratory tract</i></b> |  |
|  |  | W85        | Exposure to electric transmission lines                                                          |  |
|  |  | W86        | Exposure to other specified electric current                                                     |  |
|  |  | W87        | Exposure to unspecified electric current                                                         |  |
|  |  | X00        | Exposure to uncontrolled fire in building or structure                                           |  |
|  |  | <b>X01</b> | <b><i>Exposure to uncontrolled fire, not in building or structure</i></b>                        |  |
|  |  | <b>X03</b> | <b><i>Exposure to controlled fire, not in building or structure</i></b>                          |  |
|  |  | X04        | Exposure to ignition of highly flammable material                                                |  |
|  |  | X05        | Exposure to ignition or melting of nightwear                                                     |  |

|  |  |            |                                                                                                      |  |
|--|--|------------|------------------------------------------------------------------------------------------------------|--|
|  |  | X06        | Exposure to ignition or melting of other clothing and apparel                                        |  |
|  |  | X08        | Exposure to other specified smoke, fire and flames                                                   |  |
|  |  | X09        | Exposure to unspecified smoke, fire and flames                                                       |  |
|  |  | <b>X12</b> | <b>Contact with other hot fluids</b>                                                                 |  |
|  |  | <b>X17</b> | <b>Contact with hot engines, machinery and tools</b>                                                 |  |
|  |  | <b>X19</b> | <b>Contact with other and unspecified heat and hot substances</b>                                    |  |
|  |  | X20        | Contact with venomous snakes and lizards                                                             |  |
|  |  | <b>X21</b> | <b>Contact with venomous spiders</b>                                                                 |  |
|  |  | X22        | Contact with scorpions                                                                               |  |
|  |  | <b>X27</b> | <b>Contact with other specified venomous animals</b>                                                 |  |
|  |  | X29        | Contact with unspecified venomous animal or plant                                                    |  |
|  |  | X33        | Victim of lightning                                                                                  |  |
|  |  | X34        | Victim of earthquake                                                                                 |  |
|  |  | <b>X37</b> | <b>Victim of cataclysmic storm</b>                                                                   |  |
|  |  | <b>X39</b> | <b>Exposure to other and unspecified forces of nature</b>                                            |  |
|  |  | <b>X40</b> | <b>Accidental poisoning by and exposure to nonopioid analgesics, antipyretics and antirheumatics</b> |  |

|  |  |            |                                                                                                                                |  |
|--|--|------------|--------------------------------------------------------------------------------------------------------------------------------|--|
|  |  | <b>X45</b> | <b><i>Accidental poisoning by and exposure to alcohol</i></b>                                                                  |  |
|  |  | <b>X46</b> | <b><i>Accidental poisoning by and exposure to organic solvents and halogenated hydrocarbons and their vapours</i></b>          |  |
|  |  | X48        | Accidental poisoning by and exposure to pesticides                                                                             |  |
|  |  | X49        | Accidental poisoning by and exposure to other and unspecified chemicals and noxious substances                                 |  |
|  |  | <b>X50</b> | <b><i>Overexertion and strenuous or repetitive movements</i></b>                                                               |  |
|  |  | <b>X64</b> | <b><i>Intentional self-poisoning by and exposure to other and unspecified drugs, medicaments and biological substances</i></b> |  |
|  |  | <b>X65</b> | <b><i>Intentional self-poisoning by and exposure to alcohol</i></b>                                                            |  |
|  |  | <b>X68</b> | <b><i>Intentional self-poisoning by and exposure to pesticides</i></b>                                                         |  |
|  |  | <b>X69</b> | <b><i>Intentional self-poisoning by and exposure to other and unspecified chemicals and noxious substances</i></b>             |  |
|  |  | <b>X70</b> | <b><i>Intentional self-harm by hanging, strangulation and suffocation</i></b>                                                  |  |
|  |  | <b>X71</b> | <b><i>Intentional self-harm by drowning and submersion</i></b>                                                                 |  |
|  |  | <b>X72</b> | <b><i>Intentional self-harm by handgun discharge</i></b>                                                                       |  |

|  |  |            |                                                                                |  |
|--|--|------------|--------------------------------------------------------------------------------|--|
|  |  | <b>X74</b> | <b><i>Intentional self-harm by other and unspecified firearm discharge</i></b> |  |
|  |  | <b>X76</b> | <b><i>Intentional self-harm by smoke, fire and flames</i></b>                  |  |
|  |  | <b>X80</b> | <b><i>Intentional self-harm by jumping from a high place</i></b>               |  |
|  |  | <b>X81</b> | <b><i>Intentional self-harm by jumping or lying before moving object</i></b>   |  |
|  |  | <b>X82</b> | <b><i>Intentional self-harm by crashing of motor vehicle</i></b>               |  |
|  |  | <b>X83</b> | <b><i>Intentional self-harm by other specified means</i></b>                   |  |
|  |  | <b>X84</b> | <b><i>Intentional self-harm by unspecified means</i></b>                       |  |
|  |  | <b>X93</b> | <b><i>Assault by handgun discharge</i></b>                                     |  |
|  |  | <b>X94</b> | <b><i>Assault by rifle, shotgun and larger firearm discharge</i></b>           |  |
|  |  | X95        | Assault by other and unspecified firearm discharge                             |  |
|  |  | <b>X97</b> | <b><i>Assault by smoke fire, flames</i></b>                                    |  |
|  |  | <b>X98</b> | <b><i>Assault by steam, hot vapours and hot objects</i></b>                    |  |
|  |  | X99        | Assault by sharp object                                                        |  |
|  |  | Y00        | Assault by blunt object                                                        |  |
|  |  | <b>Y01</b> | <b><i>Assault by pushing from high place</i></b>                               |  |
|  |  | <b>Y03</b> | <b><i>Assault by crashing of motor vehicle</i></b>                             |  |
|  |  | <b>Y04</b> | <b><i>Assault by bodily force</i></b>                                          |  |

|  |  |            |                                                                                                                                    |  |
|--|--|------------|------------------------------------------------------------------------------------------------------------------------------------|--|
|  |  | <b>Y05</b> | <b><i>Sexual assault by bodily force</i></b>                                                                                       |  |
|  |  | Y08        | Assault by other specified means                                                                                                   |  |
|  |  | Y09        | Assault by unspecified means                                                                                                       |  |
|  |  | <b>Y13</b> | <b><i>Poisoning by and exposure to other drugs acting on the autonomic nervous system, undetermined intent</i></b>                 |  |
|  |  | <b>Y14</b> | <b><i>Poisoning by and exposure to other and unspecified drugs, medicaments and biological substances, undetermined intent</i></b> |  |
|  |  | <b>Y18</b> | <b><i>Poisoning by and exposure to pesticides, undetermined intent</i></b>                                                         |  |
|  |  | <b>Y19</b> | <b><i>Poisoning by and exposure to other and unspecified chemicals and noxious substances, undetermined intent</i></b>             |  |
|  |  | <b>Y20</b> | <b><i>Hanging, strangulation and suffocation, undetermined intent</i></b>                                                          |  |
|  |  | <b>Y21</b> | <b><i>Drowning and submersion, undetermined intent</i></b>                                                                         |  |
|  |  | <b>Y22</b> | <b><i>Handgun discharge, undetermined intent</i></b>                                                                               |  |
|  |  | <b>Y24</b> | <b><i>Other and unspecified firearm discharge, undetermined intent</i></b>                                                         |  |
|  |  | <b>Y30</b> | <b><i>Falling, jumping or pushed from a high place, undetermined intent</i></b>                                                    |  |

|  |  |            |                                              |  |
|--|--|------------|----------------------------------------------|--|
|  |  | <b>Y85</b> | <b><i>Sequela of transport accidents</i></b> |  |
|  |  | R58        | Haemorrhage, not elsewhere classified        |  |

Normal type denotes condition classified as time-critical by Hsiao et al. (2013). Bold/italic type denotes conditions classified as time-critical by author consensus decision.

\*\* Multiple ICD-10 codes in the non-communicable section and one ICD-10 code (R58 Haemorrhage, not elsewhere classified) in the injury section map(s) to the verbal autopsy code 98. Occurrences of the verbal autopsy code 98 in the dataset have been assigned to the non-communicable disease category; they have not been double counted by assigning to both the non-communicable disease and injury categories.

Table A2: Causes of death identified in dataset, by condition category

| Category                                 | Number of deaths | Percentage of total deaths in category / % |
|------------------------------------------|------------------|--------------------------------------------|
| <b>Maternal</b>                          | 112              |                                            |
| 09.01 Ectopic pregnancy                  | 2                | 1.79                                       |
| 09.02 Abortion-related death             | 8                | 7.14                                       |
| 09.03 Pregnancy-induced hypertension     | 26               | 23.21                                      |
| 09.04 Obstetric haemorrhage              | 66               | 58.93                                      |
| 09.06 Pregnancy-related sepsis           | 7                | 6.25                                       |
| 09.99 Other and unspecified maternal CoD | 3                | 2.68                                       |
| <b>Non-communicable disease</b>          | 2961             |                                            |
| 04.01 Acute cardiac disease              | 225              | 7.60                                       |
| 04.02 Stroke                             | 557              | 18.81                                      |
| 04.99 Other and unspecified cardiac dis  | 503              | 16.99                                      |
| 05.01 Chronic obstructive pulmonary dis  | 122              | 4.12                                       |
| 05.02 Asthma                             | 113              | 3.82                                       |
| 06.01 Acute abdomen                      | 113              | 3.82                                       |
| 08.01 Epilepsy                           | 23               | 0.78                                       |
| 98 Other and unspecified NCD             | 165              | 5.57                                       |
| 99 Indeterminate                         | 1140             | 38.50                                      |

|                                          |             |       |
|------------------------------------------|-------------|-------|
| <b>Communicable</b>                      | <b>1483</b> |       |
| 01.01 Sepsis (non-obstetric)             | 15          | 1.01  |
| 01.02 Acute resp infect incl pneumonia   | 1213        | 81.79 |
| 01.05 Malaria                            | 146         | 9.84  |
| 01.07 Meningitis and encephalitis        | 109         | 7.35  |
| <b>Neonatal</b>                          | <b>287</b>  |       |
| 01.07 Meningitis and encephalitis        | 7           | 2.43  |
| 10.02 Birth asphyxia                     | 56          | 19.51 |
| 10.03 Neonatal pneumonia                 | 95          | 33.10 |
| 10.04 Neonatal sepsis                    | 20          | 6.97  |
| 10.06 Congenital malformation            | 74          | 25.78 |
| 10.99 Other and unspecified neonatal CoD | 35          | 12.20 |
| <b>Injury-related</b>                    | <b>1042</b> |       |
| 12.01 Road traffic accident              | 420         | 40.31 |
| 12.02 Other transport accident           | 19          | 1.82  |
| 12.03 Accid fall                         | 6           | 0.58  |
| 12.04 Accid drowning and submersion      | 34          | 3.26  |
| 12.05 Accid expos to smoke fire & flame  | 36          | 3.45  |
| 12.06 Contact with venomous plant/animal | 2           | 0.19  |
| 12.07 Accid poisoning & noxious subs     | 12          | 1.15  |
| 12.08 Intentional self-harm              | 56          | 5.37  |
| 12.09 Assault                            | 444         | 42.61 |
| 12.10 Exposure to force of nature        | 1           | 0.10  |
| 12.99 Other and unspecified external CoD | 12          | 1.15  |



**Table A3: Proportion of time-critical deaths attributable to condition category, by age group**

| Condition category | Age group       |                     |                     |                     |                     |                     |                     |                  |
|--------------------|-----------------|---------------------|---------------------|---------------------|---------------------|---------------------|---------------------|------------------|
|                    | <10<br>n=924    | ≥10 to <20<br>n=184 | ≥20 to <30<br>n=458 | ≥30 to <40<br>n=837 | ≥40 to <50<br>n=686 | ≥50 to <60<br>n=622 | ≥60 to <70<br>n=636 | ≥70<br>n=1538    |
| Maternal           | 0<br>(0%)       | 10<br>(5.43%)       | 32<br>(7.00%)       | 51<br>(6.09%)       | 19<br>(2.80%)       | 0<br>(0%)           | 0<br>(0%)           | 0<br>(0%)        |
| NCD                | 0<br>(0%)       | 0<br>(0%)           | 0<br>(0%)           | 401<br>(47.91%)     | 375<br>(54.66%)     | 444<br>(71.38%)     | 476<br>(74.84%)     | 1265<br>(82.25%) |
| CD                 | 556<br>(60.17%) | 78<br>(42.39%)      | 137<br>(29.91%)     | 163<br>(19.47%)     | 139<br>(20.26%)     | 93<br>(14.95%)      | 106<br>(16.67%)     | 211<br>(13.72%)  |
| Neonatal           | 287<br>(31.06%) | 0<br>(0%)           | 0<br>(0%)           | 0<br>(0%)           | 0<br>(0%)           | 0<br>(0%)           | 0<br>(0%)           | 0<br>(0%)        |
| Injury             | 81<br>(8.80%)   | 96<br>(52.17%)      | 289<br>(63.10%)     | 222<br>(26.52%)     | 153<br>(22.30%)     | 85<br>(13.67%)      | 54<br>(8.49%)       | 62<br>(40.31%)   |

NCD = Non-communicable disease

CD = Communicable disease

Table A4: Proportion of time-critical deaths attributable to condition category, by year

| Condition category | Year of death  |                |                |                |                |                 |                |
|--------------------|----------------|----------------|----------------|----------------|----------------|-----------------|----------------|
|                    | 1993<br>n=133  | 1994<br>n=132  | 1995<br>n=154  | 1996<br>n=140  | 1997<br>n=123  | 1998<br>n=186   | 1999<br>n=182  |
| Maternal           | 2<br>(1.50%)   | 2<br>(1.52%)   | 1<br>(0.65%)   | 1<br>(0.71%)   | 0<br>(0%)      | 3<br>(1.61%)    | 1<br>(0.55%)   |
| NCD                | 65<br>(48.87%) | 61<br>(46.21%) | 88<br>(57.14%) | 88<br>(62.86%) | 62<br>(50.41%) | 102<br>(54.84%) | 84<br>(46.15%) |
| CD                 | 26<br>(19.55%) | 22<br>(16.67%) | 27<br>(17.53%) | 23<br>(16.43%) | 25<br>(20.33%) | 26<br>(13.98%)  | 44<br>(24.18%) |
| Neonatal           | 8<br>(6.02%)   | 8<br>(6.06%)   | 4<br>(2.60%)   | 4<br>(2.86%)   | 8<br>(6.50%)   | 10<br>(5.38%)   | 14<br>(7.69%)  |
| Injury             | 32<br>(24.06%) | 39<br>(29.55%) | 34<br>(22.08%) | 24<br>(17.14%) | 28<br>(22.76%) | 45<br>(24.19%)  | 39<br>(21.43%) |

| Condition category | Year of death   |                |                 |                 |                 |                 |                 |
|--------------------|-----------------|----------------|-----------------|-----------------|-----------------|-----------------|-----------------|
|                    | 2000<br>n=182   | 2001<br>n=182  | 2002<br>n=222   | 2003<br>n=247   | 2004<br>n=221   | 2005<br>n=268   | 2006<br>n=295   |
| Maternal           | 2<br>(1.10%)    | 2<br>(1.10%)   | 2<br>(0.90%)    | 5<br>(2.02%)    | 2<br>(0.91%)    | 7<br>(2.61%)    | 4<br>(1.36%)    |
| NCD                | 102<br>(56.04%) | 93<br>(51.10%) | 111<br>(50.00%) | 127<br>(51.42%) | 116<br>(52.49%) | 164<br>(61.19%) | 143<br>(48.48%) |
| CD                 | 41<br>(22.53%)  | 47<br>(25.82%) | 42<br>(18.92%)  | 49<br>(19.84%)  | 50<br>(22.62%)  | 38<br>(14.18%)  | 74<br>(25.08%)  |
| Neonatal           | 12<br>(6.59%)   | 8<br>(4.40%)   | 11<br>(5.00%)   | 13<br>(5.26%)   | 6<br>(2.72%)    | 20<br>(7.46%)   | 18<br>(6.10%)   |
| Injury             | 25<br>(13.74%)  | 32<br>(17.58%) | 56<br>(25.23%)  | 53<br>(21.46%)  | 47<br>(21.27%)  | 39<br>(14.55%)  | 56<br>(18.98%)  |

| Condition category | Year of death   |                 |                 |                 |                 |                 |                 |
|--------------------|-----------------|-----------------|-----------------|-----------------|-----------------|-----------------|-----------------|
|                    | 2007<br>n=315   | 2008<br>n=359   | 2009<br>n=334   | 2010<br>n=340   | 2011<br>n=333   | 2012<br>n=334   | 2013<br>n=398   |
| Maternal           | 4<br>(1.27%)    | 7<br>(1.95%)    | 4<br>(1.20%)    | 6<br>(1.76%)    | 4<br>(1.20%)    | 15<br>(4.49%)   | 12<br>(3.02%)   |
| NCD                | 165<br>(52.38%) | 154<br>(42.90%) | 170<br>(50.90%) | 171<br>(50.29%) | 169<br>(50.75%) | 157<br>(47.01%) | 197<br>(49.50%) |
| CD                 | 88<br>(27.94%)  | 113<br>(31.48%) | 105<br>(31.44%) | 98<br>(28.82%)  | 90<br>(27.03%)  | 102<br>(30.54%) | 108<br>(27.14%) |
| Neonatal           | 17<br>(5.40%)   | 30<br>(8.36%)   | 18<br>(5.40%)   | 23<br>(6.77%)   | 18<br>(5.41%)   | 7<br>(2.10%)    | 12<br>(3.02%)   |
| Injury             | 41<br>(13.02%)  | 55<br>(15.32%)  | 37<br>(11.08%)  | 42<br>(12.35%)  | 52<br>(15.62%)  | 53<br>(15.87%)  | 69<br>(17.34%)  |

| Condition category | Year of death   |                 |
|--------------------|-----------------|-----------------|
|                    | 2014<br>n=418   | 2015<br>n=387   |
| Maternal           | 11<br>(2.63%)   | 15<br>(3.88%)   |
| NCD                | 196<br>(46.89%) | 176<br>(45.48%) |
| CD                 | 126<br>(30.14%) | 119<br>(30.75%) |
| Neonatal           | 11<br>(2.63%)   | 7<br>(1.81%)    |
| Injury             | 74<br>(17.70%)  | 70<br>(18.09%)  |

NCD = Non-communicable disease

CD = Communicable disease

**Table A5: Cause of death in time-critical deaths with CoM indicator of discharged whilst ill**

| <b>Cause of death</b>                   | <b>Number of deaths</b> | <b>Percentage</b> |
|-----------------------------------------|-------------------------|-------------------|
| 01.01 Sepsis (non-obstetric)            | 1                       | 1.49              |
| 01.02 Acute resp infect incl pneumonia  | 16                      | 23.88             |
| 01.05 Malaria                           | 1                       | 1.49              |
| 01.07 Meningitis and encephalitis       | 1                       | 1.49              |
| 04.01 Acute cardiac disease             | 2                       | 2.99              |
| 04.02 Stroke                            | 21                      | 31.34             |
| 04.99 Other and unspecified cardiac dis | 13                      | 19.4              |
| 05.01 Chronic obstructive pulmonary dis | 3                       | 4.48              |
| 06.01 Acute abdomen                     | 4                       | 5.97              |
| 09.04 Obstetric haemorrhage             | 1                       | 1.49              |
| 12.09 Assault                           | 1                       | 1.49              |
| 98 Other and unspecified NCD            | 1                       | 1.49              |
| 99 Indeterminate                        | 2                       | 2.99              |
